# Supplementary material for: Impacting Satisfaction, Learning, and Efficiency Through Structured Interdisciplinary Rounding in a Pediatric Intensive Care Unit: A Quality Improvement Project
Source: PubMed Central journal article supplement — Pediatr Qual Saf. 2019 May 16;4(3):e176. doi: 10.1097/pq9.0000000000000176 (PMC6594789; doi:10.1097/pq9.0000000000000176), 2019-05-16
Supplement: pqs-4-e176-s002.pdf [file pqs-4-e176-s002.pdf]

**Default Question Block**

**Teaching is more dependent on the individual attending style than the structure of rounds (i.e. attendings who teach well are good teachers regardless of SIBR or traditional rounds)**

- Strongly Agree
- Agree
- Disagree
- Strongly Disagree

**Teaching during rounds is more effective than teaching before or after rounds.**

- Strongly Agree
- Agree
- Disagree
- Strongly Disagree

**The impact of SIBR rounds on resident education is:**

- Very Positive
- Positive
- Negligible
- Negative
- Very Negative

**My learning is best when:**

- I am a passive learner (being lectured to)
- I am an active learner (presenting articles, being allowed to make my own decisions for patient care during rounds).
- Other:

**SIBR rounds are more effective than rounds without structured roles.**

- Strongly Agree
- Agree
-

Disagree

Strongly Disagree

**Explain why or why not (SIBR rounds are more effective than rounds without structured roles).**

**The impact of family presence on rounds to resident learning is:**

Very Positive

Positive

Negligible

Negative

Very Negative

**Have you worked in the PICU before?**

Yes

No

**After SIBR rounds started (October 2014), did you notice a difference in the amount of pages the on-call resident received during rounds?**

Significantly less pages during rounds

Less pages during rounds

No noticeable difference in the amount of pages

More pages during rounds

Significantly more pages during rounds

**What is your level of training?**

Medical Student

PGY1

PGY2

PGY3 or greater

Fellow

Attending

**There is a culture of multidisciplinary teamwork within the PICU during dayshift SIBR rounds.**

---

- Strongly Agree
- Agree
- Disagree
- Strongly Disagree
